# Supplementary material for: The cost-effectiveness of hospital-based telephone coaching for people with type 2 diabetes: a 10 year modelling analysis
Source: BMC Health Serv Res. 2016 Sep 27;16:521. doi: 10.1186/s12913-016-1645-6 (PMC5039787; doi:10.1186/s12913-016-1645-6)
Supplement: Additional file 1: — Key input data for the UKPDS Outcome Model. (DOCX 21 kb) [file 12913_2016_1645_MOESM1_ESM.docx]

Key model inputs are summarised in Table 1. Health utility values used by the model were based on published data[[22](#_ENREF_22)]. Therefore, a health utility score of 0.78 was applied to participants without diabetes complications. Utility decrements applied to participants with a history of complications are summarised in . Cost of treating participants with and without diabetes related complications and of delivering the intervention in each simulation year are summarised in -, respectively.

: Key input data required by the UKPDS Outcomes Model

| **Demographic characteristics:** | Ethnicity (Afro-Caribbean, Caucasian, Asian/Indian)  Gender (male/female)  Age at diagnosis of T2DM (years)  Diabetes duration (years)  Weight (kg)  Height (cm) |
| --- | --- |
| **Risk factor values at diagnosis of T2DM** | AF (yes/no)  PVD (yes/no)  Smoking (current/never/ex-smoker)  Cholesterol (mmol/l)  HDL (mmol/l)  Systolic BP (mmHg)  HbA1C (%) |
| **Current risk factor values** | Smoking (current/never/ex-smoker)  Cholesterol (mmol/l)  HDL (mmol/l)  Systolic BP (mmHg)  HbA1C (%) |
| **Years since pre-existing event** | CHD - excluding MI (years)  CHF (years)  Amputation (years)  Blindness in one or both eyes (years)  Renal failure (years)  Stroke (years)  MI (years) |

Table 2: Utility decrements applied to participants during the simulation period

| **Complication** | **Utility decrement** |
| --- | --- |
| **CHD** | -0.09 (-0.126- -0.054) |
| **MI** | -0.055 (-0.067- -0.042) |
| **CHF** | -0.108 (-0.169- -0.048) |
| **Stroke** | -0.164 (-0.222- -0.105) |
| **Amputation** | -0.28 (-0.389- -0.170) |
| **Blindness** | -0.074 (-0.252- -0.124) |
| **Renal failure** | -0.263 (-0.263- -0.263) |

**Table 3: Annual cost of diabetes-related complications during the year the complication developed and in subsequent years**

|  | **In year complication develops** | | **In subsequent years** |
| --- | --- | --- | --- |
|  | **Fatal** | **Non-fatal** | **Cost** |
| **CHD** | - | 20249  (19362-21128) | 3429  (3007-3862) |
| **MI** | 15443  (12065-18972 ) | 18773  (17599-20045) | 2706  (2454-2979) |
| **CHF** | 25003  (22484-27384) | 25003  (22484-27384) | 10462  (8298-13302) |
| **Stroke** | 22807  (14633-31583) | 22559  (20759-24445) | 5943  (5194-6810) |
| **Amputation** | 32870  (30059-36082) | 32870  (30059-36082) | 6490  (5092-8087) |
| **Blindness** | - | 14297  (10262-20360) | 4893  (2557-7506) |
| **Renal failure** | 46144  (37012-55065) | 46144  (37012-55065) | 49044  (36125-60961) |

***All costs reported in $AU 2012/13.**

Table : Annual diabetes-related costs of participants without complications in the intervention versus control groups

|  | **Intervention**  **(n=25)** | **Control**  **(n=22)** |
| --- | --- | --- |
| **Diabetes-related costs** | 6091  (2183-9998) | 3107  (2530 – 3683) |

***All costs reported in $AU 2012/13.**

Table : Annual discounted cost of the telephone coaching intervention in the first through to the 10th simulation year

| **Year** | **Discounted cost** |
| --- | --- |
| Year one | 1286 |
| Year two | 1225 |
| Year three | 1166 |
| Year four | 1111 |
| Year five | 1058 |
| Year six | 1008 |
| Year seven | 960 |
| Year eight | 914 |
| Year nine | 870 |
| Year 10 | 829 |

***All costs reported in $AU 2012/13.**
